# Supplementary material
Source: PubMed Central journal article supplement (PMC6710832)
Supplement: NIHMS1040650-supplement-1.pdf [file NIHMS1040650-supplement-1.pdf]

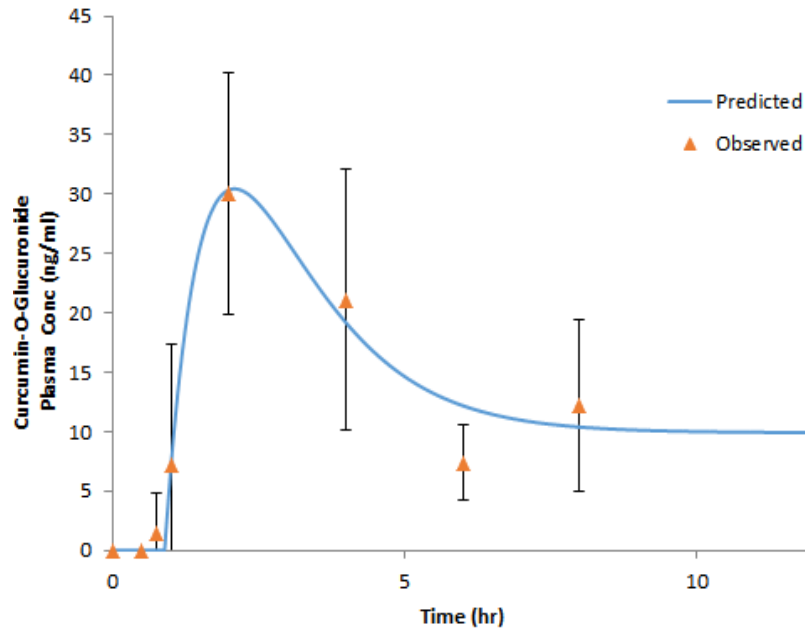

1

2 **Supplementary Figure 1: Plasma concentration-time profile of curcumin-O-**3 **glucuronide.** Concentration-time profile of curcumin-O-glucuronide (COG) as

4 described by a two-compartment model. Experimental observation data are shown as

5 the mean  $\pm$  SD and the solid line represents the Phoenix WinNonlin model predicted

6 curves after a 4 g oral dose of curcumin to 12 healthy subjects.

7

8

9

10

11

12

13

14

15

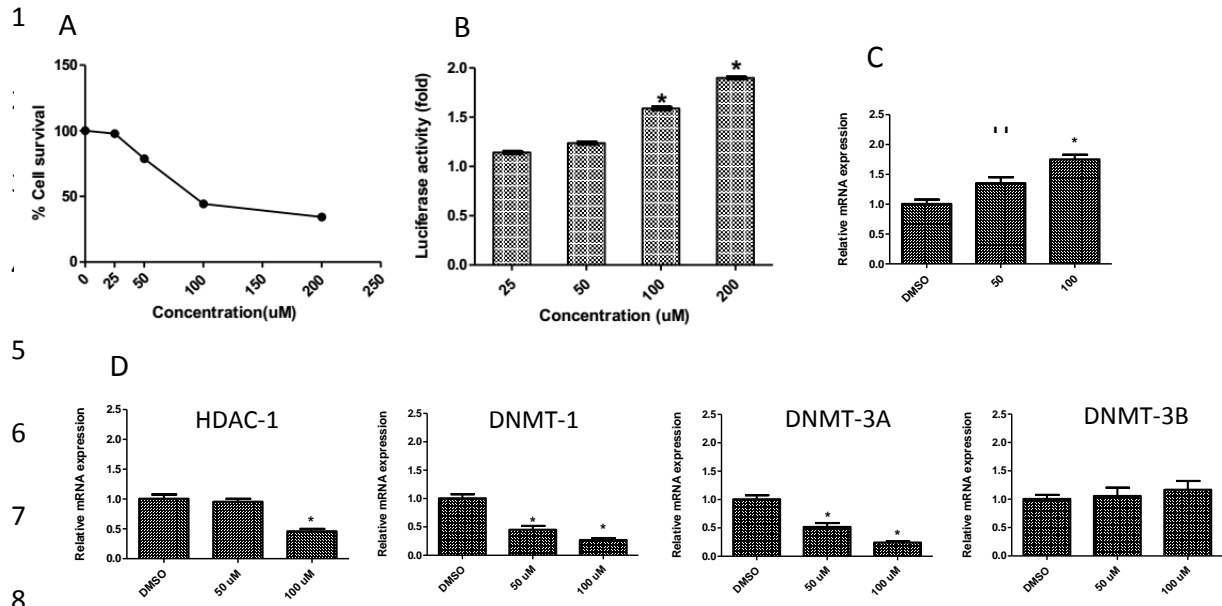

**Supplementary Figure 2. COG increases NRF2-ARE luciferase activity in**

**HepG2C8 cells.** (A) HepG2C8 cells were seeded in 96-well plates and treated with

COG for 24 hours. Cytotoxicity of COG was measured by MTS assay (B) Induction

of Nrf2-ARE luciferase by COG and results were normalized to protein concentration

and DMSO control. (C) Induction of HO-1 mRNA expression compared to control

after 24-hour incubation with COG. (D) Decrease in HDAC mRNA expression

following treatment with COG. mRNA expression was normalized to GAPDH control.

\*  $P < 0.05$  compared to DMSO control.

---

**1 Supplementary Table**

**2 Supplementary Table 1.** Pharmacokinetic (PK) parameters of curcumin-O-glucuronide in  
**3 human plasma in 2 CM**

**4**

| <b>PK Parameters</b>           | <b>Description</b>                                                            | <b>Estimation (CV%)</b> |
|--------------------------------|-------------------------------------------------------------------------------|-------------------------|
| <b>kmixed (h<sup>-1</sup>)</b> | First order Intestinal absorption, UGT metabolism and transport rate constant | 9.6000(154076)          |
| <b>tlag (h)</b>                | Absorption delay                                                              | 0.8900 (16.11)          |
| <b>Cmax (ng/ml)</b>            | Maximum concentration predicted                                               | 30.440 (10.20)          |
| <b>tmax (h)</b>                | Time to reach maximum concentration                                           | 2.0880 (41.5)           |
| <b>AUC0-12h (ng/ml*h)</b>      | Area under the curve 0 to 12h                                                 | 379.87 (237.9)          |
| <b>AUC0-∞ (ng/ml*h)</b>        | Area under the curve 0 to infinity                                            | 14576 (36900)           |

**5**
